# Supplementary material
Source: bioRxiv or medRxiv preprint supplement (https://medrxiv.org/highwire/filestream/79768/field_highwire_adjunct_files/0/2020.05.04.20087726-1.pdf)
Supplement: Supplementary file [file 2020.05.04.20087726-1.pdf]

## Supplementary Information

# Protein haploinsufficiency drivers identify *MYBPC3* mutations that cause hypertrophic cardiomyopathy

Carmen Suay-Corredera<sup>¶</sup>, Maria Rosaria Pricolo<sup>¶</sup>, Elías Herrero-Galán, Diana Velázquez-Carreras, David Sánchez-Ortiz, Diego García-Giustiniani, Javier Delgado, Juan José Galano-Frutos, Helena García-Cebollada, Silvia Vilches, Fernando Domínguez, María Sabater Molina, Roberto Barriales-Villa, Giulia Frisso, Javier Sancho, Luis Serrano, Pablo García-Pavía, Lorenzo Monserrat, Jorge Alegre-Cebollada\*

- **Supplementary Files S1-S4 (separate excel files)**
- **Supplementary Figures S1-S8 (this document)**
- **Supplementary Notes S1-S2 (this document)**
- **Supplementary Tables S1-S3 (this document)**
- **Supplementary References (this document)**

<sup>¶</sup> These authors contributed equally to this work

\*To whom correspondence should be addressed: [jalegre@cnic.es](mailto:jalegre@cnic.es) (@AlegreCebollada)

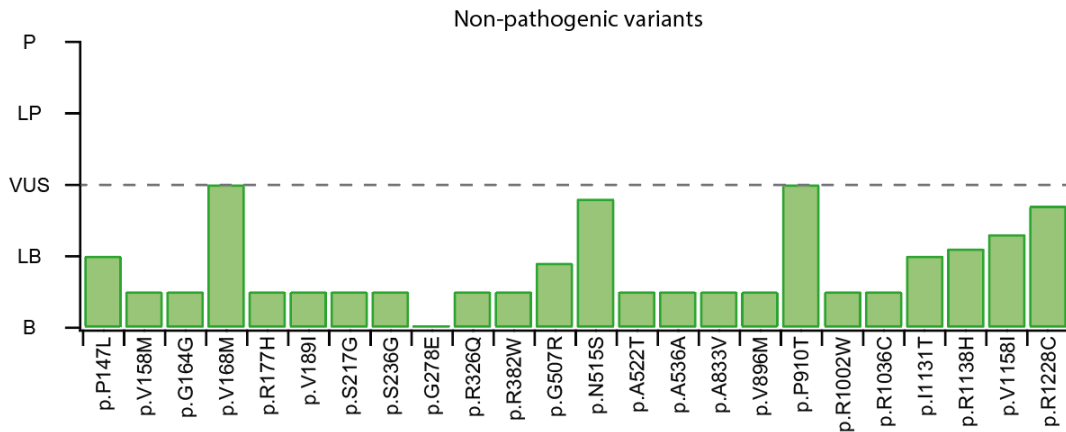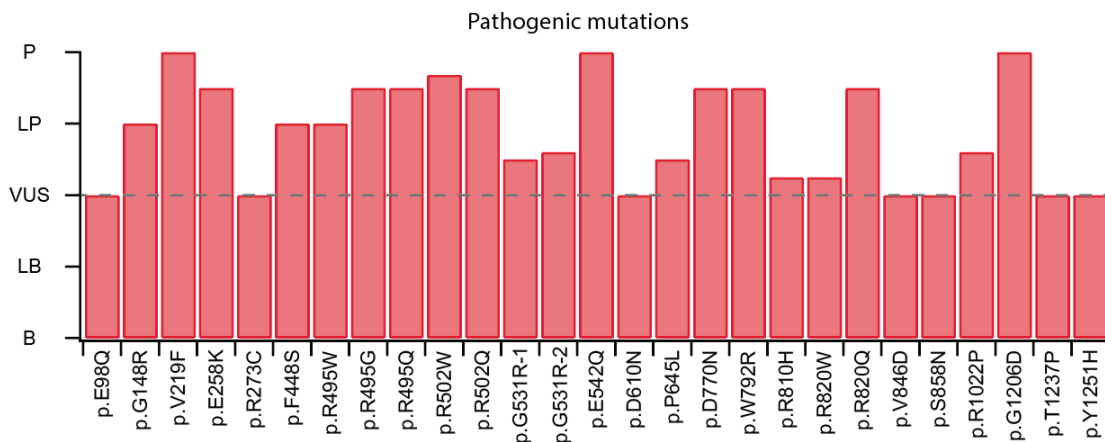

**Supplementary Figure S1. Pathogenicity assignment of *MYBPC3* variants according to information in ClinVar.** Each variant is given an average score from 0 to 4 based on the information that was available in ClinVar for 24 non-pathogenic variants and 27 pathogenic mutants. B: benign (score = 0), LB: likely benign (score = 1), VUS (score = 2), LP: likely pathogenic (score = 3), P: pathogenic (score = 4). The pathogenic mutations p.G531R-1 and p.G531R-2 correspond to c.1591G>C and c.1591G>A, respectively.

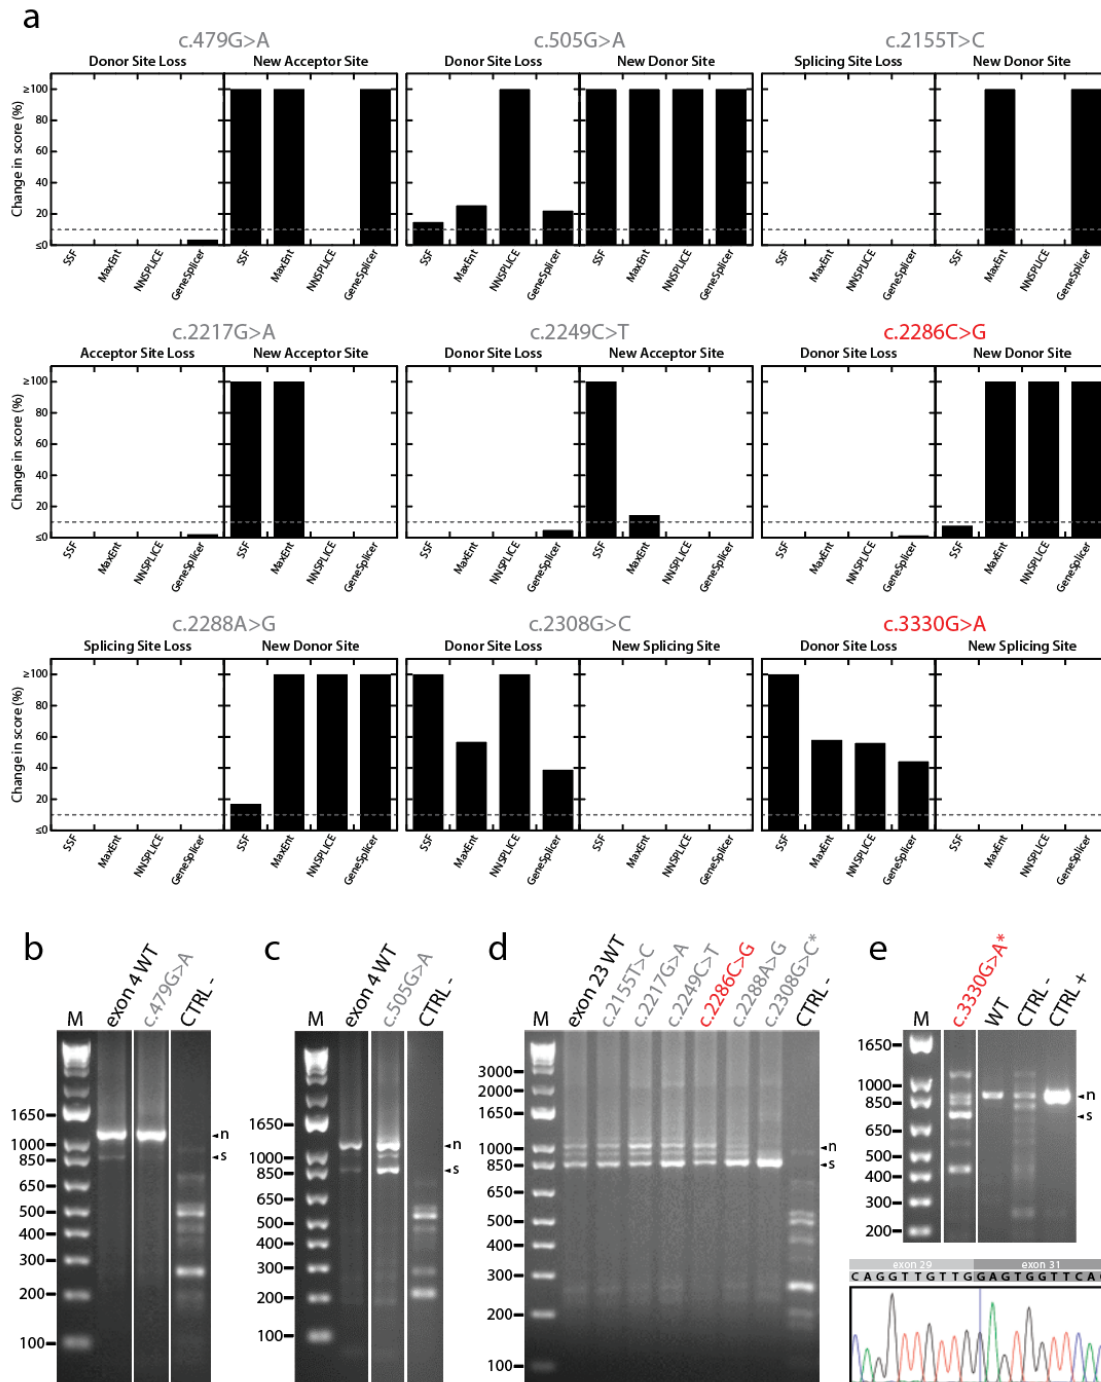

**Supplementary Figure S2. Assessment of predicted RNA splicing alterations.** (a) Prediction of RNA splicing alteration for different VUS (grey) and pathogenic (red) *MYBPC3* variants. (b-d) Assessment of predicted alterations in RNA splicing using mini-gene assays. CTRL- are non-transfected controls. (e) Assessment of predicted alteration in RNA splicing induced by variant c.3330G>A using peripheral blood. CTRL+, analysis using mRNA obtained from healthy myocardium. CTRL-, analysis using mRNA isolated from HeLa cells, which do not express *MYBPC3*. In panels (b-e), we use “n” and “s” to indicate bands corresponding to native splicing, or to skipping of exons, respectively (the other bands correspond to non-specific amplifications that could not be identified). M corresponds to 1Kb plus DNA ladder (Invitrogen) and base pairs are indicated. Asterisks mark confirmed alterations of RNA splicing. In variant c.2308G>C, no band corresponding to native splicing is detected. In variant c.3330G>A, a new band marking skipping of exon 30 is detected and verified by Sanger sequencing (bottom of the panel)

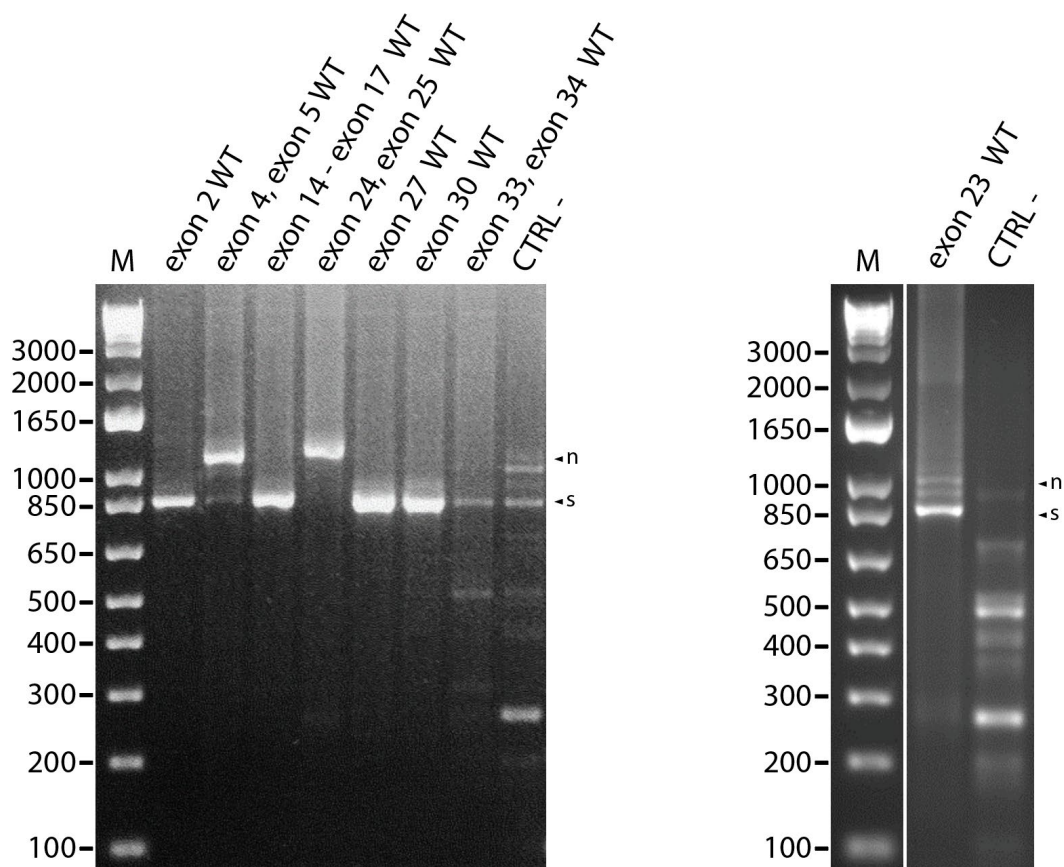

**Supplementary Figure S3. RNA splicing of wild-type (WT) MYBPC3 sequences assayed by mini-gene strategy.** In these assays, skipping of the *MYBPC3* insert results in a band at ~850 bp while correct splicing results in lower electrophoretic mobility bands (see **Supplementary File S2**). CTRL- are non-transfected controls. M corresponds to 1Kb plus DNA ladder (Invitrogen) and base pairs are indicated. We use “n” and “s” to indicate bands corresponding to native splicing or to skipping of exons, respectively (the other bands correspond to non-specific amplifications that could not be identified).

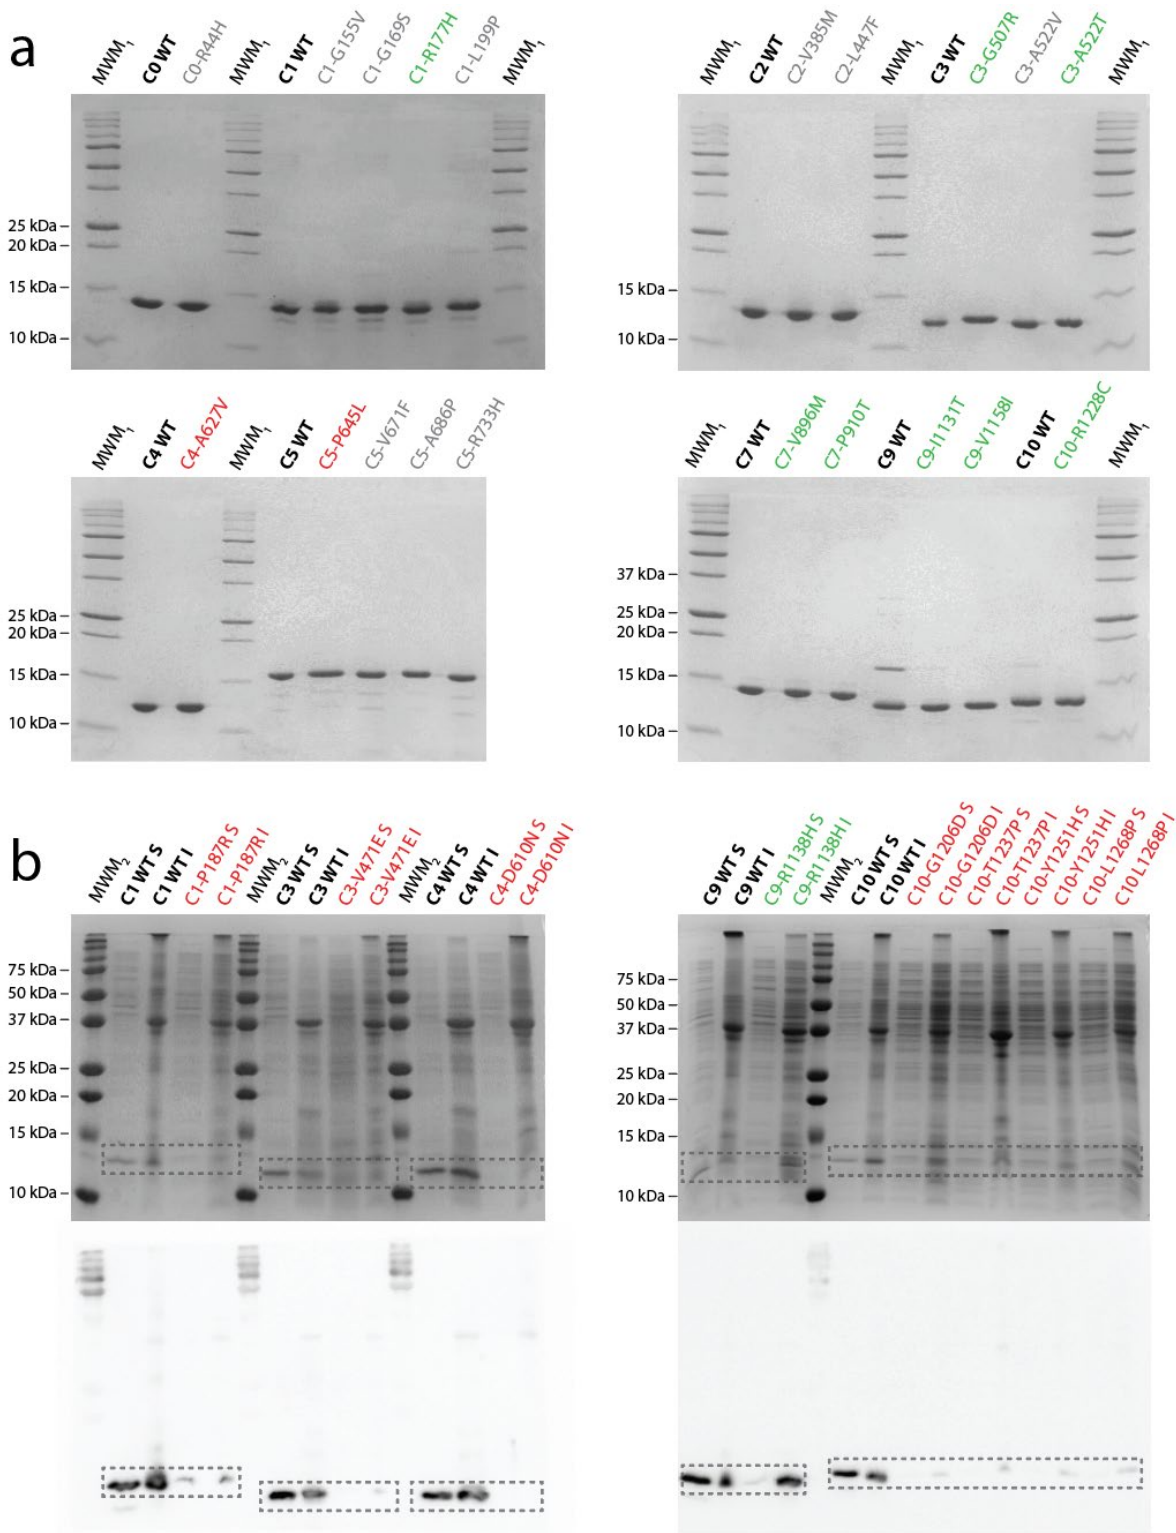

**Supplementary Figure S4. Production of cMyBP-C domains in *E. coli*.** (a) Coomassie-stained 17% SDS-PAGE gels to examine purity of WT and mutant domain preparations. M<sub>1</sub>: Precision Plus Protein Unstained Standards (Bio-Rad). (b) SDS-PAGE analysis of insoluble (I) and soluble (S) fractions from IPTG-induced *E. coli* cultures of WT domains and mutants that could not be purified. *Top*: Coomassie-stained 17% SDS-PAGE gels. *Bottom*: western-blot using anti His-tag antibody. M<sub>2</sub>: Precision Plus Protein Dual Color (Bio-Rad). Mutants are colored according to their pathogenic status: pathogenic (red), non-pathogenic (green), VUS (grey). Regions of interest appear in dashed boxes.

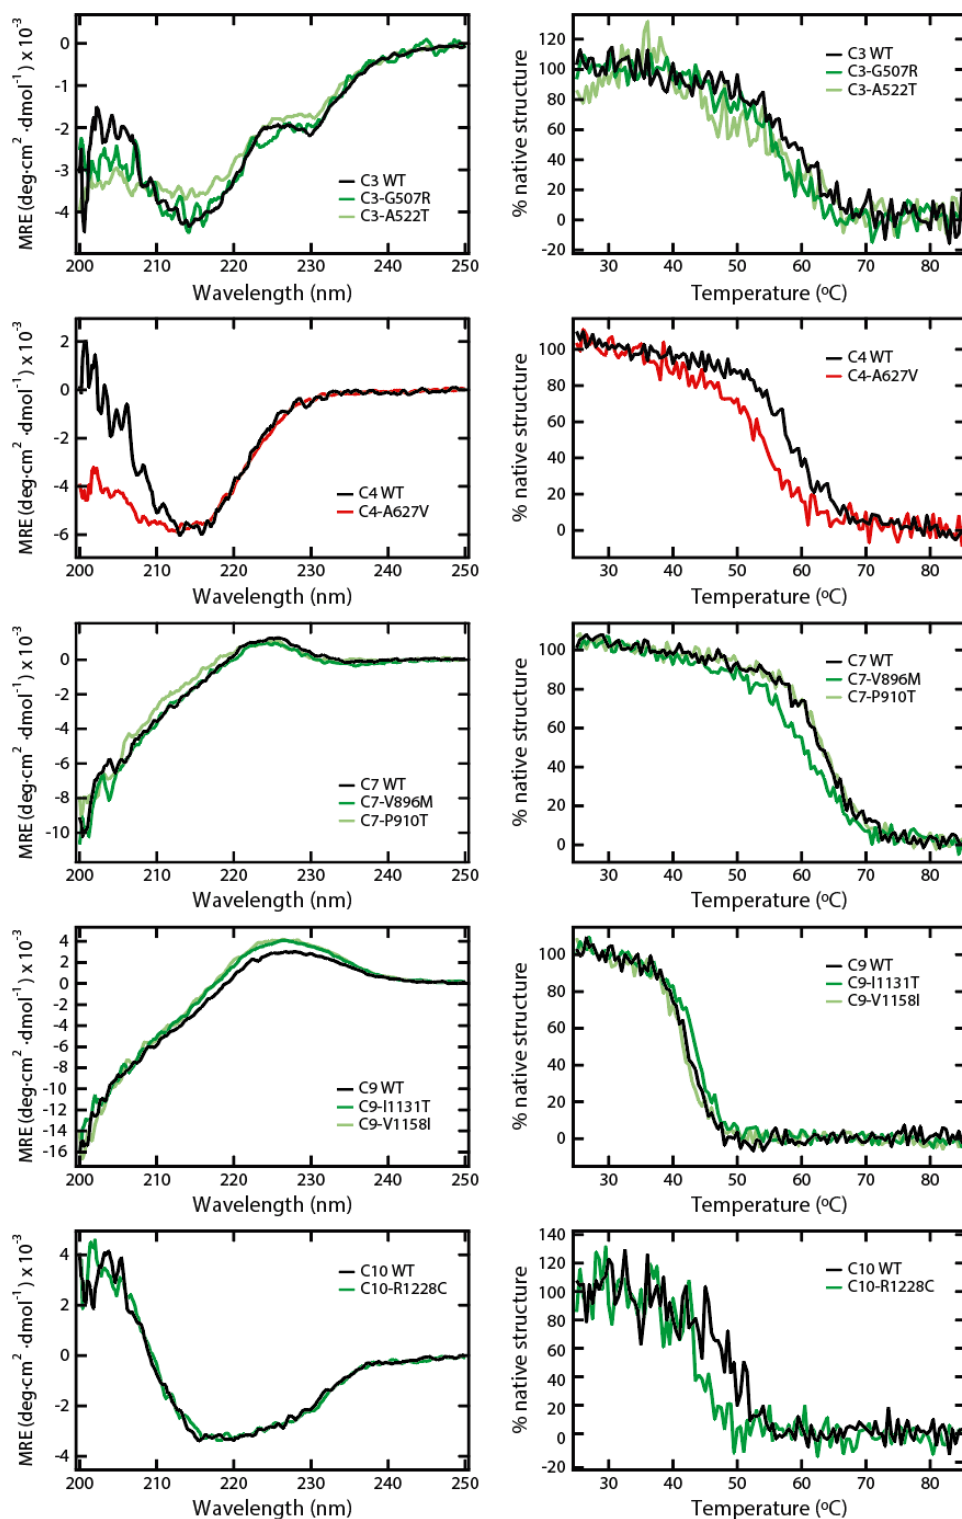

**Supplementary Figure S5. Examination of the effect of mutations in the structure and stability of cMyBP-C domains.** *Left:* Far-UV CD spectra (given as mean residue ellipticity, MRE) of WT and mutated cMyBP-C domains (green: non-pathogenic variants; red: pathogenic mutations). The spectra of domains C3, C4 and C10 show a minimum around 215 nm, which is typical of  $\beta$ -structure-rich immunoglobulin-like domains<sup>1,2</sup>. Domains C7 and C9 spectra show positive CD signal at  $\sim$ 230 nm, which is typically seen in Fn-III-type domains<sup>3,4</sup>. No major changes in CD spectra are detected for the variants shown here. *Right:* thermal denaturation profiles for WT and mutant domains.

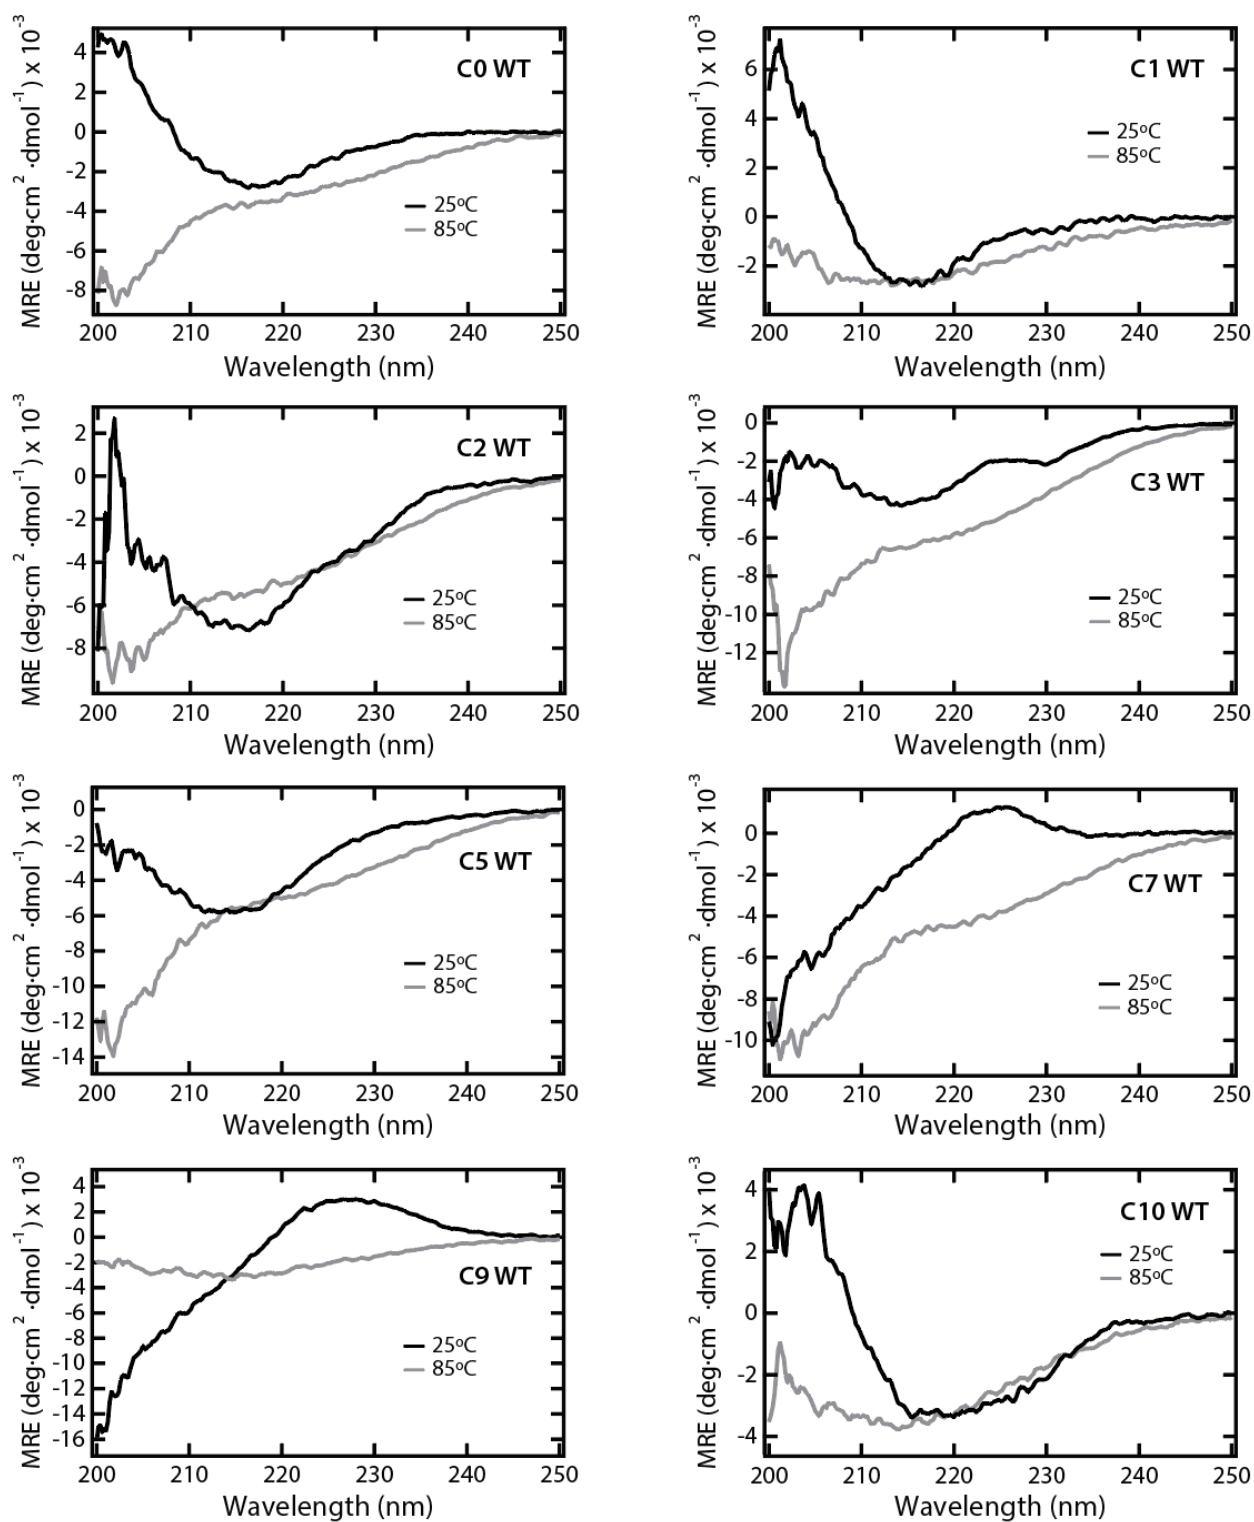

**Supplementary Figure S6. Far-UV CD spectra of cMyBP-C domains at 25 and 85°C.** Spectra for domain C4 have been reported elsewhere<sup>2</sup>. CD signals are given as mean residue ellipticity, MRE.

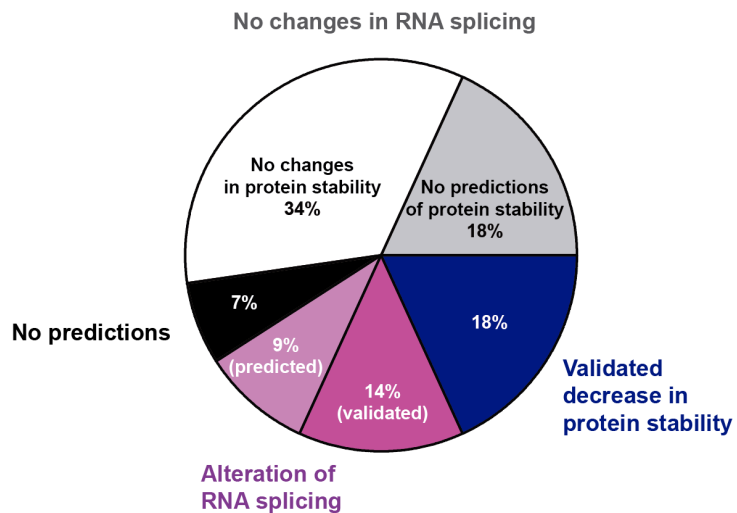

**Supplementary Figure S7. Distribution of molecular phenotypes in 44 pathogenic putative non-truncating mutations in MYBPC3.** The plot assumes that bioinformatics predictions are able to capture alterations with 100% sensitivity<sup>5,6</sup>. The pie chart also indicates the fraction of mutations for which no protein stability and/or RNA splicing predictions were available. Mutants with detected alteration of RNA splicing or extensive protein destabilization are grouped regardless of predictions of the other haploinsufficiency driver. The group for which no changes in RNA splicing are predicted includes two subgroups according to the availability of predictions for protein stability.



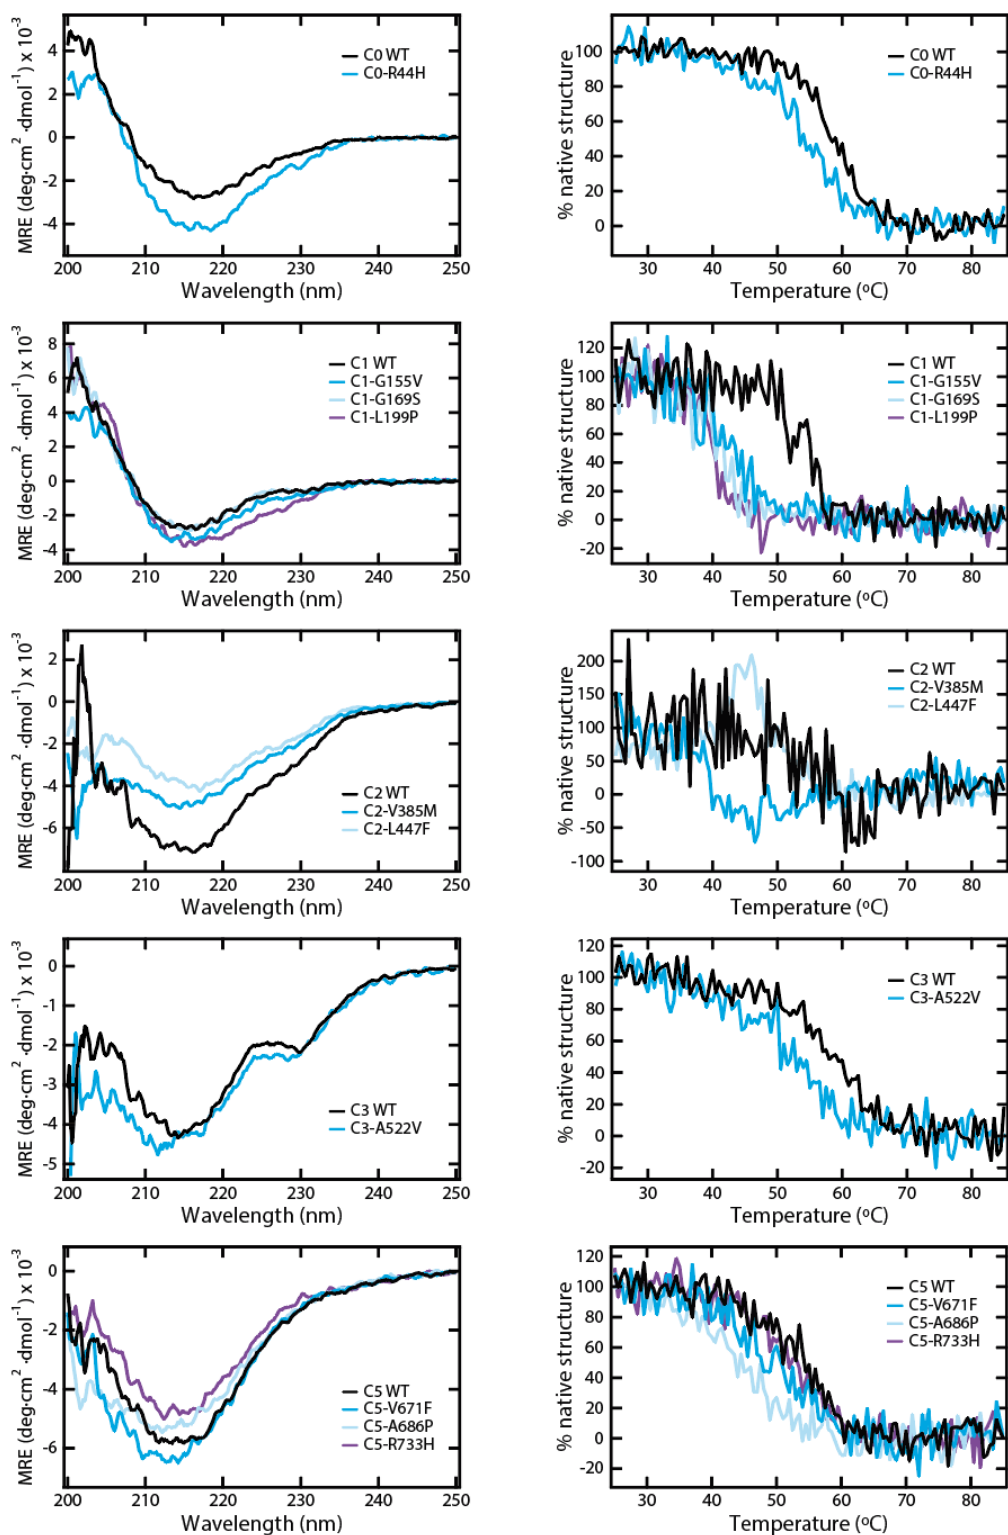

**Supplementary Figure S8. Examination of the effect of VUS in the structure and stability of cMyBP-C domains.** *Left:* Far-UV CD spectra (given as mean residue ellipticity, MRE) of WT and mutated cMyBP-C domains. Mutations correspond to the VUS predicted to destabilize the domains in bioinformatics screening. All spectra show a minimum around 215 nm, which is typical of  $\beta$ -structure-rich immunoglobulin-like domains<sup>1,2</sup>. No major changes in CD spectra that cannot be explained by errors in concentration estimation are detected. *Right:* thermal denaturation profiles for WT and mutant domains.

**Supplementary Note S1. Position of variants in the *MYBPC3* gene (ENST00000545968.6).** Variants are highlighted in red, green or blue according to their pathogenicity and identified to the right of the *MYBPC3* sequence. Mutation in one-letter amino acid code is also indicated. Format and colors used are indicated below. Variants predicted to induce alterations of splicing are indicated: donor loss (DL), acceptor loss (AL), donor gain (DG), acceptor gain (AG). Validated predictions are underlined and experimentally discarded predictions are crossed out. Exon numbers are indicated at the beginning of each exon.

|                        |                                          |
|------------------------|------------------------------------------|
| EXON                   | <b>Pathogenic mutation</b>               |
| <b>CODING SEQUENCE</b> | <b>Non-pathogenic variant</b>            |
| intron                 | <b>Variant of Uncertain Significance</b> |

AGTCCCTCTTTGGGTGACCTGTGCCTGCTTCGTGCCTGGTGTGACGTCTC ex1  
 TCAGG**ATGCCTGAGCCG****GGGAAGAAGCCAG**gtagctttaggactggggtt **c.13G>T (G5W)**  
 gggctcaagtgtgggagcaggggggtgtctacaattggggagcagggcta  
 ggagggagttcttgaggggggtgacgaggacgtggcctctgagcccagga  
 acaggggagccagtcctccaggggccttttttgattctcggtttctttt  
 tcccatccctctgatgagaggtgaaggtaaacccaaggtcagggagcag  
 agaggggacacagccaagacaggaagcaccgggggtcaaccattctgag  
 aatgcaaagggaccccttccctgtcccattgccttccaccttccacagcaa  
 ggttccccgcggacagagcccagctttagtatggagctgagccaggtca  
 cggcatgccttcagaccagtctctaccactatgggtctcagctctccaa  
 cctgggggtgcccgggggtgggtggcattggggtgggttctctctggctgt  
 gacattatctgcttcatgagcctgtacgggtgtggcccccatggtgaggg  
 gacacagcccctcttctctgagagaggacagtcaggagcccctgaacca  
 ggccaagggcagggaaaatcacagcccagggacctgggcctgggctgtgc  
 ccttatgaaggttgtccagggcagagatccaggtccccatccccagcgc  
 cctcccagggcagctttatctcagttgctgatacccagcctgaggtcctt  
 ggaggacaaatttgccacattccaagtaggcagacttccccgcccctg  
 ccaagggcccgaatggttgggggaaagggagctgggttcatcacgggtg  
 tctccaagcagggaaagtggacacatgcagaaaaagtcttggttgggaggt  
 caggaccacagccctggctctcccagctgctagctgtgtgatcttgagg  
 agccgcttagcttctctgagcctcagtgctcctcctctgagaaatgaacag  
 aataactgcaactacctcagagaactggtagagtattacgtgaggggatg  
 catagaaagtgctagcacagatattactgagaggggctgcaggggcccggg  
 tgacgctccaaccaggggcccgtgtagcctccacctggccctcag**TCT** ex2  
**CAGCTTTTAGCAAGAAGCCACGGTCAGTGGAAAGTGGCCGCAGGCAGCCCT** **c.39C>T (S13S) DG; c.41A>G (K14R)**  
**GCCGTGTTTCGAGGCCGAGACAGAGCGGGCAGGAGTGAAGGTGCGCTGGCA** **c.50G>A (R17Q); c.74G>A (S25N)**  
**CGCGGAGGCAGTGACATCAGCGCCAGCAACAAGTACGGCCTGGCCACAG** **c.97A>G (T33A); c.104G>A (R35Q)**  
**AGGGCACACGGCATA CGCTGACAGT CGGGAAGTGGGCCCT GCGGACCAG** **c.122G>A (R41H)**  
**GGATCTTACG CAGTCATTGCTGGCTCCTCCAAGGTCAAGTTCGACCTCAA** **c.131G>A (R44H)**  
**GGTCATAGAGGCA** **c.194C>T (T65M) AG; c.205C>T (R69W)**  
**AGGTCATAGAGGCA** **c.220G>A (A74T)**  
**GGTATAGAGGCA** **c.239C>G (A80G)**  
**GGTATAGAGGCA** **c.292G>C (E98Q) DL**  
 gtaagatcctgatcagccttccctgaggtttgggt  
 gctgggggaggggagcccagcactctccatccatccagggaaacaggag  
 gtgctttcacactttcttgcctttgctgtggctgtgccccccgcccaggaa  
 cgccctttcccccttttctgcacatgacctctctgagtacccccatgtgc  
 catcctggcttgttccagccatggggtaggtgggagagatgaacaagaca  
 caaccctctctccccctgcagacctcctggggagatgacctgcacag  
 acggccgggaagcccaggagctgtggatgaggggagtgagcccagctct  
 gaggggctgctctaaggctggggcagagcagggatggacctggagctgtt  
 cagggcagatgcagaggacatgggaactgatggcctgggacggggaggag  
 aatgtgagagggcaggtggctctccagctcagcatgagctgcctctgagg  
 ggcccaggcagcgggaggacagccatggcagactttcctcatccacagcg  
 ggctcatgggtccaatgctcaggagagagaggggtggaggggtctctggtt  
 agtggctgcccactcactccatctgatccccctccag**AGAAGGCAGAGCC** ex3  
**CATGCTGGCCCCCTGCCCCCTGCTGAGGCCACTGGAGCCCCCTGGAG**  
**AAGCCCCGGCCCCAGCCGCTGAGCTGGGAGAAAGTGCCCCAAGTCCCAAA**  
 Ggtgagaggggctgggcagggaggggagggatccgtgggttagggcgtgtc  
 cagggcaggtctcaaaagcctttgctgggcccaggtgagggtggctcagggc  
 tataatccccagtagctttgggaggccgaggtgggcccagatcatgaggtcag

gagattgagaccatcctgggtaacatgatgaaacccccatctctactaaaa  
atacaaaaaaattagccgggctgggtggcgggcacctgcggtcccagcta  
acttgggaggctgaggcaggagaatgggtgtaacctgggaggcggagctt  
gcagtgagccgagattgtgcctctgcactccagcctgggtgacagagcaa  
gactccatctcaacaacagaaaaagcctttgctcacagGGTCAAGCTC  
AGCAGCTCTCAATGGTCCTACCCCTGGAGCCCCGATGACCCCAITGGCC

ex4  
c. 440C>T (P147L) ; c. 442G>A (G148R) AG  
c. 461T>C (I154T) ; c. 464G>T (G155V)  
c. 466C>G (L156V)  
c. 472G>A (V158M) ; c. 479G>A (R160Q) AG  
c. 492C>T (G164G) DG ; c. 502G>A (V168M)  
c. 505G>A (G169S) DL, DG

TCTTCGTGATGCGGCCACAGGATGGCGAGGTGACCGTGGgtgagtgag  
ctgctgtgccagcattgggggtgggaagggggggcagcaggacactcccc  
aagccgggctgtcgcccctgcctttgagGTGGCAGCATCACCTTCTCA  
GCCCGCGTGGCCGGCGCCAGCCTCCTGAAGCCGCCTGTGGTCAAGTGTT

ex5  
c. 529C>T (R177C) ; c. 530G>A (R177H)  
c. 532G>A (V178M) ; c. 553A>C (K185Q)  
c. 560C>G (P187R) ; c. 565G>A (V189I)  
c. 581G>A (G194D) ; c. 596T>C (L199P)  
c. 598A>G (S200G)  
c. 631G>A (D211N) ; c. 649A>G (S217G)

CAAGGSCAAATGGGTGGACCTGAGCAGCAAGGTGGGCCAGCACCTGCAGC

TGCACGACAGCTACGACCGCGCCAGCAAGgtgggtccaccggggctcgtgg  
agacacggagagaggggacatggagagccctagaaggcacaaggcacaca  
gagggcacatgagacccagaggcacacacgagctgcaagcaaggggtgt  
ggggaatctgggaggcaggtggagggggccagggggccacagggagatccc  
ggaggcctggggggcagggagtgcatgaggtcatgggagcactgtcgg  
ggacctgggagacttgggtggacatgatcacctcaagggggcacctaataa  
ggtttggccgggggtggggggtcgcccaggggtggtcaggaagcctggagg  
acactgtgaagcagggggcaccagctagtgggggtgtaaagcccctgga  
tgggtgagatcagggctaagggctcaagggactctcagggattaaccag  
aacaattcctcattatacagacacggaaccaaagccttgagaggttaagt  
ggctgctccaaggtcacttagacatagcctagaaccttaagccttcggt  
ttttgtgttttgtttttttccgcccctgcccaccagaaccttaaggcttaa  
gtccccctgtttgttactccaagcctctgcttttcccaaccttccccag  
tcctgggctaggcaagggggcctctagcaagagaggccaacatgttctgc  
tgtgccccgtgtgcattgcacaaaagcctgtatttcaccacaacctatgt  
gccagcagatggcaatcatgggtttcgagatagtcccctttctctgtaca  
aaaactctgtatgggttaactaaagcctgaggggtgcgaagatcgatgagc  
atgtgtcactcccagcctcctttaaataatataatataatataatattga  
gacagggctcgcctctgtcgcctcaggctggagtgagtggtcaatctcg  
gctcactgcaacctccacctcctgggttcaagcgattctcccacctcagc  
ctcccagtagctgaaactagaggtgtgcaccaccataacttggctaattt  
tcgatttttttagtagagacggaatttcaccacggttggccagggctggtc  
ggagctcctggtcttatgtgatccgcccgcctcagcctcccaaagtgggg  
attacagggctgagccaccgcccggccactcccagctctcctttaaggg  
tgccgagccttgtctcccggccctgggtgtccctgacgcccctcctc  
catgcacacagCTCTATCTGTTGAGCTGCACATCACCGATGCCAGCCT

ex6 c. 655G>T (V219F) AL  
c. 659A>G (Y220C) DG ; c. 667G>A (E223K) ;  
c. 682G>A (D228N)  
c. 706A>G (S236G) ; c. 742G>T (D248Y)  
c. 768C>A (V256V) ; c. 772G>A (E258K) DL, AG

GCCTTCACTGGCAGCTACCGCTGTGAGGTGTCCACCAAGGACAAATTTGA  
CTGCTCCAACCTCAATCTCACTGTCCACGgtgagggggccctgggtgtctg

tcctgggctcgggctccccatgggtcctggtctcctacctccttttccca  
acactaaggaggatgcctcgtcccatccagacatgagtgctggccacgtg  
cccagtgctgcacacacaggggtgtgagagaaacccaaggcttgcaggg  
aggcgtgggggcttagggctgagtcgggtctcatctgggtgggactctg  
tttatcatcttgggtgtcacggctcctggccatggcctggcactgtctg  
aatgtttgggcatgggtgaaggtgagttgagagatgggtgggaattggg  
gacaataaacctgcccacctgcctgggtaccttgacctgggaaaggctgg  
gaaggtgagatcctggggcagatgccagcctcatggggtcatgaatggg  
caagtctgtgaatactcagaggccgccccagggcagggcttctcaaacg  
gccccctctgaagccccttccccatctctccacctttgaaccagAGG

ex7  
c. 817C>T (R273C)

CCATGGGCACCGGAGACCTGGACCTCCTATCAGCCTTCCGCAGCACgtga  
gtggccatcctcagggcctgggggaggccagtgctggagctcagggcct  
tcagggctcgcactgggggtcagggctggggatgatttgcggggcggagc

tgaagtcagtgggggctgcaggggagagcaagcttcccagggcaggtgagg  
 atactgagtcctaaccacacagGAGCCTGGCTGGAGGTGGTCCGGCGGATC ex8 c. 833G>A (G278E)  
 AGgtaccacctgccccagggccctacctgcacatcccgagacccccagggg  
 tctgagacgggtgggagcccaatctggctagtgtcccttttccctcccc  
 actccactcccactctgtcctaatacctttccagtcctcactgcagcc  
 tcaactgggggtccctctccatagTGATAGCCATGAGGACACTGGGATTCT ex9  
 GGACTTCAGCTCACTGCTGAAAAAGAGgtgagtcctgggtggcagttcct  
 ggggcagctggtgaggcctggctccaaatcccagcactgtggtttgcccag  
 ctgtgtgacctgagcacaactgcacctctctgagttggtttctctgt  
 ctgtcgaggggatcccagtggtggaaggagttaaagggctctgcagac  
 attatgtcccgtcaacagtcctcctcacagtgctccccacggccactcca  
 cacttgaggctgcaaaagctccctccgtaaaactccggggagccagaagga  
 acagagagaggggtccccagagctgcaggggtctaccaggtcggcccaactg  
 acttatgttctctctgcccctctctcctctcccccgccccctccatta  
 tggctgctgctgctgtggcccagAGAgtagaatcggggctctgggtgttt ex10  
 gggggcggcagggcgctggtgggtgcagaggggattcccgtcccctctct  
 gagaggctgtggtgagagactcagagcaggggtgcccgtccccacggacag  
 ggggtgagctctctgtgcccctgggcttctcctgccacccacctatctgtcag  
 agcttaggagggataagaaaaagtaatgcacacagggaggtcctgccagag  
 cctccggagcagcatgggtgccccacaacacagggagtgcaagtgcggaa  
 aatagggaggaagtaaggcccatgggtgggggtccaggtctttgagggaa  
 ggtggccatacctctcatgtgccacctacccttttccccacccccacccc  
 tggagcagCAGTTTCCGGACCCCGAGgtgagtgcccaacatagcagca ex11  
 cctcatcacccttaattctgccaggagcccctccagatccccagcccct  
 cttcagctcccctggccccagtcctgcccctggcctgggacccagagcagc  
 tccagctggccccaccagaaggggaaggggagaggggacaggggtggctaca  
 gctccttggctcctggcccaggaagcccggcccagggggctgcagctcttg  
 cccccggccacagcctagactgcccggacacagGGACTCGAAGCTGGAGGC ex12  
 ACCAGCAGAGGAGGACGTGTGGGAGATCCTACGGCAGGCACCCCATCTG c. 977G>A (R326Q)  
 AGTACGAGCGCATCGCCTTCCAGTACGGCGTCACTGACCTGCGCGGCATG  
 CTAAAGAAGGCTCAAGGGCATGAGGCGCGATGAGAAGAAGAGCACAGgtta c. 1052G>A (R351K)  
 gcccttccctcagaggggagaggagagggcacaggttagcccttccctaca  
 caggagaggagagggcataggttagcccttccccacaggggagaggagag  
 ggcacaggttagccccccacctcgtccacatacatggaaagagcggagtc  
 cggcttagcacagagactcacaggaaagaagagcccaggttaaccctcc  
 ttgtgtagaaaaagccaagaatgccaggttagcccttaccacagagat  
 agaagagaagagcaaaagttaggccaggacagccacaaggaaaaggacag  
 agctcaggttaaccctcctcaccaaggaaaaatcaggctacactttcttt  
 ctctaccctcttctgaaaagaaatgaagcccgggttaaccctctccacacc  
 caaaagaaaagggaagagggcccgttaagcctggagagccacacacaggca  
 aagaaaagagcctggctaattcttctctcaggcaaaacaaagcaggagggc  
 ttgggttaactaccctcacccccaggcagatggaaagaggagagcccagg  
 aatagcccttctccactgaggggttgacaagggcgggtgtgagccgggaa  
 agcaggggtctcacatgcccctctccccaccatgtctgggtctagcacagg  
 gcctggcacacacctcgagcgtctataaacaccgactgaatggaggggt  
 cagcttccatgcaggatatgggagacaagcccctccaaagcacacacac  
 aaaacacacacgatcatggggaggggagaggagctgggttagtccctccc  
 tgctgacctccccaggccccttatccctctgcccctgcccctctgtgtc  
 tcagcctcactgggtttcccatcaccctcctgctaggtggcctggccctt  
 accggcacctggcccatttaagccagggatcccctgaatgccaccaat  
 gttcctctgggttaactcctgaactgctgagcccagagggcaccacagcaa  
 aggactgtaggtgccaaggaggaaaagatggaggctggcaaggcagatg  
 gggacctccgagggtaggggtgtcttccaggaatagcaacaacagtaaaa  
 agagcaaatgtctggccaggtgcagtggtcacgcctgtaatcccagcac  
 tttgggagggccgagggcaggtggatcacctgaggttaggcgttcaagacca  
 gcctgaccaacatggtgaaaccccgtctctactaaaaatacaaaattacc  
 tgggcatggtggcaggcgccctgtaatcccagctactccggagggctgaggg  
 aggagaatcacttgaaccgggaggcagaggttgacgtgagtcaggattg  
 tgccattgactccaacctgggtgacagaatgagactccatctcaaaaaa  
 agtgagtgagttccttccctaaagccagccactaggtgctttatgtaattat  
 ctatttaattctcgaacaacactatgatggaaggactattaccatttc

catgttactgaggaaccgagggcacagaggggtttaaggaactagcgcaag  
gtcacagagcaccagcagtagatctctgcccctccgagctgactccag  
gcccagccagagtatttgaggactcaggggtccttctctgctcgggtgat  
ggagccccacttccctcctgggctcagcagcagcaacatgggcttttac  
aaacacggccgcaagaggaggcattggttgggagcagggctgggctcaag  
accagctctgccacacacctgctgggctgggtggcattgggcccagtcgcc  
tctctgagccctatttccccactgcagcagcatggggaccaccgactg  
gcctgggggctgagatgggagtgagagtgctgggacagagggctgcta  
gggggagcgcctgggaagagtacacaactcaggggttgctgagagaaga  
gaaggcacagctgtcccagcttctcctgacaagcttctgtcttctc  
tgaagcccctaaccatccctgagctgagcaggtggagaggaccccaa  
ggaagacagaaggacaaggtcagacagacagagacaaggaggtgggtga  
cacatagacacagataaagaaatgaagacacatgcctgtaatcccagca  
cttgggaggctgaggcgggcacatcacctgaggtcaggatttcaagacc  
agcccggccaacatggtaaaaccccgtctctactaaaaatacaaaaatta  
gctgggctggtggcacatgcctgtaatcccagctactcgggaggccgag  
gcaggagaatcacttgaacctgggagggcagaggttgacagtgagccaagat  
ggcgccattgcactccagcctggccaacagagcaagactctgtccaaaaa  
acaacaaaacagacaaaacaaaacaaaagaaatagagacacagaga  
agtgaagcggggcgccacagaggggattggaggggggacctgggccc  
agccacagccacagtagcttggcctggggagcaggggtgcgggcgggtggg  
gtggccggggctgaggggtggtgctcagCCTTTCAGAAGAAGCTGGAGCC  
GGCCTACCAGGTGAGCAAAGGCCACAAGATCCGGCTGACCGTGGAACTGG

CTGACCATGACGCTGAGGTCAAATGGCTCAAGAATGGCCAGGAGATCCAG  
ATGAGCGGCAGgtgcagcctgggggtggggaggggggctcgggtggaggtg  
gggacccccatagccttgctcctcctgcccctctccacatgcgtatctctga  
ctcgggtggtctcagccccatctctctgggctaatttcccatccttt  
tgctcctgcccgtccctctctctctccttttctcgggctcacttcc  
tcccgtcgggaacacttcaacggccccttctgttctacagCAAgtaaagt  
ccctctggatggccttgggggtggggggcacagggattatcatggggcgca  
ctgggcccggaggggtgtccgcagcttctcctgccacttccctgcggcccc  
caccagGTACATCTTTGAGTCCATCGGTGCCAAGCGTACCCTGACCATC  
AGCCAGTGCTCATTGGCGGACGACCGCAGCCTACCAGTGCCTGGTGGGTGG

CGAGAAGTGTAGCACGGAGCTCTTTGTGAAAGgtgggctgggacctgag  
gatgtgggaacctggggagggatggcctcaggggagccaacctcatgc  
tcaccctgcctggacagAGCCCCCTGTGCTCATCACGCGCCCCCTTGGAGG  
ACAGCTGGTGTGTTGGGGCAGCGGGTGGAGTTTGTGAGTGTGAAGTATCG

GAGGAGGGGGCGCAAGTCAAATGgtgagttccagaagcaggggcatggg  
tgttgggggcatctgccagaagaggccacagcacttgcaccccaccac  
ccggtcagGCTGAAGGACGGGGTGGAGCTGACCGGGAGGAGACCTTCAA

ATACCGGTTCAAGAAGGACGGCAGAGACACCACCTGATCATCAACGAGG  
CCAATGCTGGAGGACCGGGGCACTATGCACTGTGCACTAGCGGGGCCAG

GCGCTGGCTGAGCTCATTGTGCAGGgtgagcctggctgggggggacatg  
aggctttagggcttggaccctcagccccaccccacctagccctgtagg  
ggagcaggcaaacctgggctcaaggcctctgtgaccttgggctttgaca  
gcctaaacctcatccttctcatctctaaaatgacgatgctgaggtgaccg  
ctccagagggtagaggggtcatacgggctggtgagcatcaccaccc  
ctcagacacttgaggttcccttatgtgactgcacatcacaggcaaacat  
ggcacacacaggcacacgtgttttccatgcccacatgcaccagacag  
tgcgaccagcgccccatgggcccacagccctccacagggattcagcca  
caccacacaccctcccagctcaatggctctgccttgcctgagAAAA  
GAAGCTGGAGGTGTACCAGAGCATCGCAGACCTGATGGTGGGCGCAAAGG  
ACCAGCGGTGTTCAAATGTGAGGTCTCAGATGAGAATGTTTCGGGGTGTG

ex13 c.1112C>G (P371R)  
c.1113G>A (P371P) ; c.1128C>A (S376R)  
c.1144C>T (R382W) ; c.1153G>A (V385M)

c.1213A>G (M405V) DG; c.1219G>A (G407S)

ex14

ex15 c.1255C>T (R419C)  
c.1287G>A (A429A) AG; c.1293C>A (D431E)  
c.1294G>A (A432T) ; c.1309G>A (V437M) DG  
c.1339C>T (L447F) ; c.1343T>C (F448S)

ex16 c.1369A>G (T457A) ; c.1373G>A (R458H)  
c.1386C>A (D462E) ; c.1408C>T (R470W)  
c.1412T>A (V471E)  
c.1445C>T (A482V)

ex17 c.1466A>T (D489V) DG; c.1468G>C (G490R)  
c.1483C>T (R495W) ; c.1483C>G (R495G)  
c.1484G>A (R495Q) ; c.1498A>C (K500Q)  
c.1504C>T (R502W) ; c.1505G>A (R502Q) AG  
c.1519G>A (G507R) ; c.1544A>G (N515S)  
c.1553T>C (M518T) ; c.1564G>A (A522T)  
c.1565C>T (A522V) ; c.1591G>C (G531R)  
c.1591G>A (G531R)  
c.1608T>A (A536A) ; c.1624G>C (E542Q) DL

ex18

TGGCTGAAGAATGGGAAGGAGCTGGTGTCCCGACAGCCGCATAAAGGTGTC  
CCACATCGGGCGgtgagtggtgcagggcaggtggatgggacaggtggagac  
tgagatggagacagagagagacacagggagaaacagagagagagagataa  
agacaggtggacagagaggcagatgcacagagacaggacagagactgaga  
cagagaccacagagaggagaaaacagacagaccacaaaaagacaaagaga  
cagaaagacagaaatagttctatagagacagaaagatatgcacagggagg  
cacacacataggagagttcgtcagagacagagaagaacagagggacagag  
acaagaggcagcagggagagacacggacggggtcgagcgctccccagca  
ccctccccagcttgtgaccagggcagggcagggaggccaccaaggaggcc  
ggctctggccagaggccctcactgcctctcccgcctcttctgctcatccct  
ggagcaactgggtggtggcgtgctggggccaagttcacagagattaatgag  
accagccccctgccagctccaagggcccagccaaggagatgctttgat  
gtagaaatcacttttacgctgcctacctctgaaggcacattaaaaagctg  
gaaaattagataatatagaaaaaaaaaggcatttttaaaaatcagaatac  
caacaagccaggacaaggtgagggcctcctgggaccctggctggggatc  
tggcaaggccaggggtgtgtggcccagtggggtccctgagccactgctc  
ccctgcagGGTCCACAAACTGACCATTGACGACGTACACCTGCCGACGA  
GGCTGACTACAGCTTTGTGCCCGAGGGCTTCGCCTGCAACCTGTCAGCCA  
AGCTCCACTTCATGGgtgagcctgctccagggtaggggtgggtcggggcag  
tggggccaggagccccctgtcactgggccccctgcctttgccccctgctact  
tgctcttccctctcttgcagAGGTCAAGATTGACTTCGTACCCAGGCAGG

ex19 c. 1828G>A (D610N)  
c. 1880C>T (A627V)

ex20

gtaagtcttggggccccctgagtccttggttctgctcactttcccgcacccc  
accacgcaggcctccccctccactcacagaggggaagagcaaggatcaaaa  
gtgggggtcctggggcccagcttcagctttgccactcatgacctgggtc  
aattataatctctgtgagcctcagtttccctcttctctaaaaatgggaaccc  
tgatagtgccacctcataggatagttataaagatgaggtgacatgatgta  
tcagacctgtcaagtgtgctcacatgtgtgactgtttattattacatctt  
tcttcttcttccctttttttttttattttttttttttttttttttggagcggagtctcc  
ctctgtcgcacagctggagagaagtggcgcatctcggctcactgcaag  
ctccgcctcccaggttcacaccactctcctgcctcagcctcctgagtage  
tgggactacaggcgcggccaccatgccagctaattatTTTTTgtattt  
ttagtagagacgggtttaccatgttagccaggatggtttcgatctcct  
gatctcatgatctgcctgcctcggcctcccaaagtgtgggattacaggc  
gtgagccactgctcagactgctttgtttgttttaactgagggcagatt  
cctgattttatTTTggccagggaacctttttaatgtgtgcatgtgtgctgc  
atgtgtgctgcgctgtgtgtgtgtgcatgtgtctgtgtgtgtatgtat  
atgtgtgtctgtgtctgtgtgtgtgctgtatgtatgtgtattttgtgtct  
gtgtgcatgtgtgtgtctgtgtgtgcatgtgtgtatgtgtatgtgtgtct  
gtgtgtatgtgtatatgcgtgtgtgtgtgtgtattgtgtgtgtgtgtatg  
tgtgtggcaagacactgatgtttccccagttttcaaaatgctatgctagg  
tgacctgacctgaatattacaagcctcccagccaacgtcctgggggtgatg  
ggaatgttcagatcttggttggattaataattgcatgggtgtattcatc  
tgtcagaactcagcctactgtcagatctgagcataaaactataacctcaata  
caaactcaaaaaaccaataaccagggggcccaggctcttgagcagccccgc  
cccagtgacctgtgctcctcctctcctcctcctcctcctcctgaactacattg  
tgtcttctgcaagAACCTCCCAAGATCCACCTGGACTGCCAGGC CGCATA

ex21 c. 1934C>T (P645L)  
c. 1939A>G (I647V) ; c. 1960C>T (R654C) ;  
c. 1961G>A (R654H)  
c. 1979T>C (V660A) ; c. 2011G>T (V671F)  
c. 2035C>T (P679S) ; c. 2056G>C (A686P)  
c. 2063C>T (T688M)

CCAGACACCATTGTGGTTGTAGCTGGAAATAAGCTACGTCTGGACGTCCC  
TATCTCTGGGGACCCTGCTCCCAGTGTGATCTGGCAGAAGGCTATCACCGC  
AGgtactgtgggtccctcctcagtcctcccatctataagatgggtgtgtg  
gaaccagccaagtgttaggacctgctgcacacccccaccacatgtgcacg  
ccctgctgttggctacccccatgggagagactgggtcagggggcaggcaagg  
tgggcagtggtgggtcaggggtggaagaagcagcagagggggcgctccag  
gctgagtcagctcctctgctccctacttccctcctgcctgttcccagGG  
GAATAAGGCCCCAGCCAGGCCAGCCCCAGATGCCCCAGAGGACACAGGTG  
ACAGCGATGAGTGGGTGTTTGACAAGAAGgtgagtgagactgaggtcagg  
aggaggctcgtttgtctttcatcactttctacctacgtgggtgcccagagcc  
ttggcgaggtctccatggagggtgccacacttggccgggtgtgttctgctgcc  
cccagcagggtccctgtggggccccctcacacctcaggcagaggggtctctgt

ex22  
c. 2077G>C (A693P)  
c. 2139T>G (F713L)

gaagtgtgctgatggccatcacaaggatgtggacaccctctcattgccag  
gaagccctcatgactgggctgctccctggctcccttcatcctaagctgac  
cttgaccttgaccttgtgctccctctcaactcaggagtagtttctgagac  
acttttctgccagtgtagctgccgggtcttgctcctgcctggcactggt  
ggttcttctgaaggctggggtcttgaggggtcctcatgatagctcatctg  
agaggacagggtggttggcccagggtcccgtgacaaagctagaaccggagcc  
cctgccctcagtcgggtgccacagagatgattttgaaactagatgctgacgt  
ggatgcagcttcccacaggctgtgttccccccatggacccccgggacat  
ctggctgttggcggaggctgcaagggcctctggggctgacttggatctc  
accccaactctgcacccccccagCTGCTGTGTGAGACCGAGGGCCGGGTC  
CGCGTGGAGACCACCAAGGACCGCAGCATCTTCA CGGTTCGAGGGGGCAGA

GAAGGAAGATGAGGGCGTCTACACGGTTCACAGTGAAGAACCCTGTGGCGC

AGGACCAGGTCAACCTCACAGTCAAGGTCATCGgtgaggccggccggggt

ccaagctggagaacacagaggggagccccaaggagggcccatccgttcg  
ctcattcagccactcgacaaacatcacgggcatgctccctgagccgagcg  
gcaacaggacagggttttctgccc aaaaggagccccgctctgggggagat  
ggaggcagatgcatccagcagatttctgacactgctgtacatgagcc  
atgtccagagtgcctttaggaggctgagaagatgggtgaggaaggcattcccag  
gcagaggaactgtgtacaaaggggtggaggagggaaggcccttttggg  
tgtggagaatgaatgaaacatgtcaggagaggactgggtggggttgggag  
gatcagagccaggacaggggtgaatatgggcagtgagaagcctaaaggg  
ttgacggaggctggcgacatgatcagaaatgcatcctggtgagaccag  
cctggacaacacagtgagactccatatacactaaaaaaaaaaaaaaaaaa  
ggaaaagaagaaagaaatgcattctagaaagatctctttggatctggggg  
tgggtgggggagcctgtggcggttagttggagtgggaaggggacgagcaa  
cgttactcaaggccctgagcggggcagggctgatgtgggtccatcccacc  
ccatccagACGTGCCAGACGCACCTGCGGCCCCCAAGATCAGCAACGTGG  
GAGAGGACTCCTGCACAGTACAGTGGGAGCCGCCTGCCTACGATGGCGGG  
CAGCCCATCCTGGgtgagtgaaggccaccggatggaggtgtgagggcgc  
caaacagatccgagggaaaggtggtgtggggatgcctgggttccagaccag  
agctgccacctcccctgagccagGCTACATCCTGGAGCCCAAGAAGAAGA  
AGAGCTACCGGTGGATGCGGCTGAACTTCGACCTGATT CAGGAGCTGAGT  
CATGAAGCGCGGCGCATGATCGAGGGCGTGGTGTACGAGATGCGCGCTA

CGCGGTCAACGCCATCGGCATGTCCAGGCCCAAGCCCTGCCTCCCAGCCCT  
TCATGCCTATCGgtgagcctgcctggcctggtcctgccccccgccccctc  
cccagttaaaaacctccaataatagcagggtgctctgcaggcagccatgct  
agacactcacatccacagtcctcttccatcctcgactggggatactcagc  
cgattttacagatgaggaacaggctccaagcagttaaatgacctgctt  
gagatctcccagctgggttgggggtggagctgactctcacactacgcccagc  
cctagttcacgtttcaagcctctctttccatgtctacaaaatgggaataa  
tgacactgcctatctcagagagctgttaggatgatatgggatgaccaggc  
aggccatctggcatctaacagggtgctcaataaatgttctattgtcccctgt  
tctccacacccttcaaccagggttttccatgaggatggggcaagggc  
tgtagtttagtggaggggtctcaggggcatctgtctgtggaaagagtcctg  
gaccaagactcagagatggcagaggcagctccatgggtccccggggggcca  
actggagtcatccctccctgaagcctcagcttccctcatctgtataatggg  
gtctgagtgggcagaacagggtgttgagactgtggcagggctcaggaggac  
acctgttcccactagggtgggtgagtcggggggcagctgcctgtggcaag  
ggcaggccaaggaccctgggcccagggtggggcacagcttgggaagat  
ggcaggaaatcggggcctgtgggggagaagggtccaggcctctcgttttagg  
gactgattcctggtttgttcagttcttagtcaactcacctaatacacaagc  
gccaggaaattcccagtttctgtagtttttagttttttagtttttttttt  
tttttttttttttgagatggagatctcgcctctgtcaccagactggagtg

ex23 c. 2155T>C (C719R) **DG**  
c. 2176C>T (R726C) ; c. 2197C>T (R733C)  
c. 2198G>A (R733H) ; c. 2210C>T (T737M)  
c. 2213T>G (V738G) ; c. 2217G>A (E739E) **AG**  
c. 2234A>G (D745G) **DG**; c. 2246A>G (Y749C)  
c. 2249C>T (T750M) **AG**; c. 2252T>A (V751D)  
c. 2269G>A (V757M) ; c. 2273G>A (G758D)  
c. 2286C>G (V762V) **DG**; c. 2288A>G (N763S) **DG**  
c. 2300A>G (K767R) ; c. 2308G>A (D770N) **DL**  
c. 2308G>C (D770H) **DL**

ex24 c. 2374T>C (W792R)

ex25 c. 2429G>A (R810H)  
c. 2458C>T (R820W) ; c. 2459G>A (R820Q)  
c. 2498C>T (A833V) ; c. 2503C>T (R835C) **DG**  
c. 2537T>A (V846D)  
c. 2573G>A (S858N)

agtcctggcgcgatctggggctcactgtaaccttcacctcccagggttcaag  
 caattctcccacctcagccttctgagtagctgggattacaggcatccacc  
 accatgcccagctaattttttgattttttgtagagacggagtttcaccatg  
 ttggccaggctggcttgaactcctgacctcaggtgatcctcccacctcg  
 gcctcccaaagtgctgggattacaggcgtgagccaccgtgcctggctgct  
 gttgctgtttgttttaagccaatctacagacatgtcttgtaacagggac  
 aaaatattccttaaagtggccaaaagccagctgaacaggaagtgccccct  
 atgtgaccagtgggcagttcagagcttagggcatggatctccagcttccc  
 caggettgtcagaccctctgacctctcctctgcccag**GTCCCCCA** ex26  
**GCGAACCCACCCACCTGGCAGTAGAGGACGTCTCTGACACCACGGTCTCC**  
**CTCAAGTGGCGGCCCCAGAGCGC****GTGGGAGCAGGAGGCCTGGATGGCTA** c. 2686G>A (V896M)  
**CAGCGTGGAGTACTGC****CCAGAGGGCT**gtgagtgccccgcccccaacccc c. 2728C>A (P910T)  
 cctcccaaaggaagaacatgctcaccttgccattgagcagattcacctg  
 tagtcaagtttttaggccacttttgcgaaagttgaggacaccagag  
 aaatatctgtcctgttttcagaagtaaaaaagcttgctagtgaaaaaca  
 aatgcagagtaagctgactgtaacacttctttgagcagtgcgaaatcag  
 caactacattttaaaaacatatttaaggccaggcgcgatggcttacgct  
 gtaatcccagcactttgggaggccaaggtgggaggatcacctgaggtcgg  
 gagttcgagaccagctctgaccaacgtggagaaaccccgtctctactaaa  
 atacaaaattagccgggtgtgggtggggcacctgtgatcccagctacgc  
 gggaggctgaggcaggagaatcacttgaactcgggaggcagaagttgcgg  
 tgagccaagatcatgccattgcaactccagcctgggagacaagagcgaaac  
 tccatctcaaaaataaataaacaataaaaaatttaaaaaacatattta  
 atcctggagattcctatcagaggagtgggcagtgaggagtggggtgctcagt  
 ggtgacacagctgtggccttgctccccctccccaccaccag**GCTCAGA** ex27  
**GTGGGTGGCTGCCCTGCAGGGGCTGACAGAGCACACATCGATACTGGTGA**  
**AGGACCTGCCACGGGGGCCGGCTGCTTTTCCGAGTGC****GGCACACAAT** c. 2834G>A (R945Q) AG  
**ATGGCAGGGCCTGGAGCCCCTGTTACCACCACGGAGCCGGTGACAGTGCA**  
**GGAGATCCTGC**gtgagtgccccctttgtgagtcacaagaccgccattga  
 cccccaggcccttgggtgtccagtggagggtggggacagttggggaggccc  
 agaatgctctgccagaacgctgggcagagacaggaggggttgagccat  
 cgtccatgcttaggccttagggaaaaagtgagagaggggtggccaggcac  
 agtggctcaagcctgtaatcccagcactttaggaggccaaggcaggcaga  
 tcaactgaggctcaggagtttgagaccagcctggccaacatagtgaaccc  
 tgtctctactaaaaatacaaaaactagccagggtgtgggtggcgcgctgctg  
 tagtccctcaactacttgggaggctgaggcagaagaatcgcttgaccg  
 ggagggtggcagttgcaatgagctgagatcacactattgcaactccagctctg  
 ggtgacagagtgagacaacgtctcaaaaaaaaaaaagtgagaaagggc  
 tctcttgggtgatgtcagtccttagttctggaacagggaagtaaaagc  
 cacagtaccaagctctctccaggagtgctcagctccaacaggtaaat  
 attgtctatgtagtcagattgggtccctctgggatccacttcccattcctt  
 tgttccctgtcccacaaaggggtccatcttttgaaggattgggttctcaa  
 agctggaacgaggcagcaaaactcaggtggttaacaacacagggcatagggt  
 gtcaaagcccaggcttacacctggctctatgacttactagctgtgtgact  
 tcagtcaagttgcttacctctctgatccctgccttttgaagtgggtgagg  
 ctggggaagccagctgggcttgggcagcctggagttgctgtgttagcag  
 gagctaaaggaggcgcagggcccagcaggcagcttttttcttagctgcag  
 ctctctgggccttgtctcaaggagggttgagctgtggagcccctcagag  
 ctgtggcgggcccctcacttagctaccactctatacccacag**AACGGCCA** ex28  
**CGGCTTCAGCTGCCAGGCACCTGCGCCAGACCATTGAGAAGAAGGTCCG**  
**GGAGCCTGTGAACCTTCTCATCCCTTCCAG**gtgggactggcccccttcc  
 ctgtccccaggggagagaggctatagtgtgttggttcccatccagtgagc  
 tgatgtctcagggtggcctgatctgaggtaccagaggctgggggtggcgg  
 ccggcccttggagtgatccaggttcagggttaagcttttccctcccctcag  
**GGCAAGCCC****CGGCCTCAGGTGACCTGGACCAAGAGGGGCAGCCCCTGGC** ex29 c. 3004C>T (R1002W)  
**AGGCGAGGAGGTGAGCATC****CGCAACAGCCCCACAGACACCATCCTGTTCA** c. 3064C>A (R1022S) ; c. 3065G>T (R1022L)  
 c. 3065G>C (R1022P)  
**TCCGGGCCGCT****CGCCGCGTGCATTACGGCACTTACCAGGTGACGGTGC** c. 3106C>T (R1036C) AG ;  
**ATTGAGAACATGGAGGACAAGGCCACGCTGGTGTCTGCAGGTTGTTG**gtg  
 gtggccaaggcctccttgagcccccttgtttcccttccctgggctgggct  
 gctggggccaagggtggggccaggggacccaaccacagctcacattttc



cagtccactgccccagcaggcctggccctgggtggcaggggtgggggtggt  
ccctggagccagtgacccccctgctcactgtcaggaggcgtggtgacccaa  
ctgggtctgtctcccgcag**ACAAGCCAAGTCCTCCCCAGGATCTCCGGGT** ex30  
**GACTGACGCCTGGGGTCTTAATGTGGCTCTGGAGTGGAAGCCACCCAGG**  
**ATGTCGGCAACACGGAGCTCTGGGGGTACACAGTGCAGAAAGCCGACAAG**  
**AAGACCAT**gtgagcccagggtctgggggtccccacgtgcaccctgctag **c. 3330G>A (M1110I) DL**  
gcccggcagaccagggccgcagctacccttactgtcctcaccgtggacc  
cctcaccctccctctgctgatctgaatccctccatagtaggggtggagat  
gccaagggcaccagagaggtctctggcatcaggaagggcctggcccag  
agatgctcccctcccctcccag**GAGTGGTTCACCGTCTTGGAG** ex31  
**CATTACCGCCGCACCCACTGCGTGGTGCCAGAGCTCATCAT**TGGCAATGG **c. 3392T>C (I1131T)**  
**CTACTACTTCC**CGTCTTCAGCCAGAATATGGTTGGCTTTAGTGACAGAG **c. 3413G>A (R1138H)**  
**CGGCCACCACCAAGGAGCCC**GTCTTTATCCCCAGACCAGgtgctgtaccc **c. 3472G>A (V1158I)**  
tcattcttccaaccaggggtggtggggcagggaggctgtgggaacagggaga  
ggggcctagctttgtgtggccctctcggtagcaagtcctgtcaccaacag  
GCATCACCTATGAGCCACCCAACTATAAGGCCCTGGACTTCTCCGAGGCC ex32  
CCAAGCTTACCCAGCCCCTGGTGAACCGCTCGGTTCATCGCGGGCTACAC  
TGCTATGCTCTGCTGTGCTGTCCGGG**G**TAGCCCCAAGgtagggaaacttta **c. 3617G>A (G1206D)**  
ggcgtggtccaggccgaccaggaggcagggctcacaggccccgacgttg  
agcagtcctctcccagcctgtctcccctgctttctctccacctgggggt  
gtatggaccgggttccctcccctgggcagggccatggtactcactcttg  
ttccatgtttgtttccagccttgggcatagtcagggactctcgtgggacc  
ccccagtagaaacacagatgtgtctcccctgggtcccctgccaggtcccct  
ctcagcctggatggcttcccctcccctctctttaccttatttatag**CCCAAG** ex33  
**ATTTCTGGTTCAAGAATGGCCTGGACCTGGGAGAAGACGCCCGCTTC**CG **c. 3682C>T (R1228C)**  
**CATGTTACGCAAGCAGGGAGTGTG**ACTCTGGAGATTAGAAAGCCCTGCC **c. 3709A>C (T1237P)**  
**CCTTTGACGGGGGCATC**TATGTCTGCAGGGCCACCAACTTACAGGGCGAG **c. 3751T>C (Y1251H)**  
**GCACGG**TGTGAGTGCCGCC**T**GGAGGTGCGAGgtgaggagccctcggggcc **c. 3790T>C (C1264R) DG ; c. 3803T>C (L1268P)**  
agggcctgggagatgggaagagcgggcggcagtggggaccctgggctttg  
ctccgttgcctcggccaagcacctgccctggctgcaagggcacggacc  
tgccacgcccagatgggcaatagcttccagaaggctgggaggacacagtg  
acatggcctcctcttctgag**TGCCTCAGTGA**CCAGGCTGGCTCCTGGGG ex34  
ATGGCCAGgtatgtaccacccgacacccagggcacaagtcaagtggctgag  
ccctggcccttggctcctggggcagccatcagtaaattgggaggctgtaggg  
gccctccattcactcgtgaagataacctgtgttcagGTACAACCGGATGC ex35  
CAGCCCCGTGCCAGGAGCCTGGAGGGAAGTTGGGGAAACCCCTCCCTACT  
GTTGGATGTATGTGTGACAAGTGTGTCTCCTGTGCTGCGATGGGGGATCA  
GCAGGGCAGTTGTGCGGCAGTCTGAGTGGGTGTTGCACAGACTGGTCCA  
CAGGGCTCCTGAAGGAAGCCCCTGGATCTTTGGGGTAAAAGGAGGGTGGC  
CTCAAGAAACAATGTCTGGGGACAGGCCTTTCTGGCCTGCTATGTCTTCC  
CAATGTTTATTGGGCAATAAAAGATAAGTGCAGTACAGAGAACTCACTC  
TTCTCA

**Supplementary Note S2. Statistical tests for the association of cMyBP-C haploinsufficiency drivers to pathogenicity.**

In the case of alterations of RNA splicing, we considered all variants for which native splicing sites were detected (40 pathogenic with 11 predicted alterations and 22 non-pathogenic with 2 predicted alterations). Among those, 6/8 pathogenic mutations and 0/2 non-pathogenic variants had confirmation of altered splicing (**Table 1**). If we exclude the three positive predictions that could not be assessed experimentally, the contingency table for statistical testing would be:

|                                  | <b>Non-pathogenic variants</b> | <b>Pathogenic mutations</b> |
|----------------------------------|--------------------------------|-----------------------------|
| <b>Alteration of splicing</b>    | 0                              | 6                           |
| <b>No alteration of splicing</b> | 22                             | 31                          |

$$p = 0.046$$

We can also consider expected validation rates of those mutations. Among them, c.292G>C (p.E98Q) is predicted to cause a splicing site loss (86% validation rate considering pathogenic, non-pathogenic and variants of uncertain significance, **Tables 1,2**), while c.2834G>A (p.R945Q) and c.3790T>C (p.C1264R) are predicted to cause a splicing site gain (13% validation rate considering pathogenic, non-pathogenic and variants of uncertain significance, **Tables 1,2**). Hence, we predict that at least one extra variant could be verified if access to blood samples was possible for these mutants. The final contingency table for statistical testing would be:

|                                  | <b>Non-pathogenic variants</b> | <b>Pathogenic mutations</b> |
|----------------------------------|--------------------------------|-----------------------------|
| <b>Alteration of splicing</b>    | 0                              | 7                           |
| <b>No alteration of splicing</b> | 22                             | 33                          |

$$p = 0.037$$

In the case of protein domain destabilization, bioinformatics predictions are available for 21 pathogenic mutations and 12 non-pathogenic variants. Experimental data were collected for the three mutant domains with the highest predicted destabilization in both groups. Six more mutants per group were experimentally studied in domains for which predictions were not available. Hence, the total number of mutants studied was 27 (pathogenic) and 18 (non-pathogenic). The final contingency table for statistical testing is:

|                                   | <b>Non-pathogenic variants</b> | <b>Pathogenic mutations</b> |
|-----------------------------------|--------------------------------|-----------------------------|
| <b>Protein destabilization</b>    | 1                              | 8                           |
| <b>No protein destabilization</b> | 17                             | 19                          |

$$p = 0.048$$

| Variant (cDNA) | Variant (Protein) | Experimental splicing alteration (myocardium) | Experimental splicing alteration (blood) | Experimental splicing alteration (mini-gene) | Reference |
|----------------|-------------------|-----------------------------------------------|------------------------------------------|----------------------------------------------|-----------|
| 505+5G>C       | -                 | -                                             | Yes                                      | Yes                                          | 5,7       |
| 772G>A         | E258K             | Yes                                           | Yes                                      | Yes                                          | 5,8-10    |
| 821+3G>T       | -                 | Yes                                           | Yes                                      | -                                            | 8         |
| 821+5G>A       | -                 | -                                             | Yes                                      | Yes                                          | 5,11      |
| 927-9 G>A      | -                 | Yes                                           | No                                       | Yes                                          | 5,8,9,12  |
| 1090G>A        | A364T             | -                                             | Yes                                      | Yes                                          | 8,12      |
| 1227-13G>A     | -                 | -                                             | Yes                                      | Yes                                          | 5,13      |
| 1624G>C        | E542Q             | Yes                                           | Yes                                      | Yes                                          | 5,8,11,14 |
| 1624+4A>T      | -                 | Yes                                           | Yes                                      | Yes                                          | 5,8,9     |
| 1928-2 A>G     | -                 | Yes                                           | Yes                                      | -                                            | 9,15      |
| 3330+5G>C      | -                 | -                                             | Yes                                      | Yes                                          | 5,16      |

**Supplementary Table S1. Analysis of RNA splicing of *MYBPC3* variants using different biological sources.**

| <b>Variant (cDNA)</b> | <b>Variant (Protein)</b> | <b>Pathogenicity</b> | <b>Consequence of RNA splicing alteration</b>          | <b>Reference</b>                      |
|-----------------------|--------------------------|----------------------|--------------------------------------------------------|---------------------------------------|
| <b>442G&gt;A</b>      | G148R                    | Pathogenic           | Exon 4 deletion 37bp, G136Efs*11                       | 5                                     |
| <b>655G&gt;T</b>      | V219F                    | Pathogenic           | Exon 6 skipping, V219Rfs*42                            | 5,12                                  |
| <b>772G&gt;A</b>      | E258K                    | Pathogenic           | Exon 6 skipping, V219Rfs*42                            | 5,8-10                                |
| <b>1213A&gt;G</b>     | M405V                    | VUS                  | Exon 13 deletion 11bp, M405Qfs*5                       | 5,12                                  |
| <b>1624G&gt;C</b>     | E542Q                    | Pathogenic           | Exon 17 skipping, W486*                                | This work and <sup>5,9,11,12,14</sup> |
| <b>2308G&gt;A</b>     | D770N                    | Pathogenic           | Exon 23 skipping, L717Tfs*52 (predicted as in 2308G>C) | 9                                     |
| <b>2308G&gt;C</b>     | D770H                    | VUS                  | Exon 23 skipping, L717Tfs*52                           | This work                             |
| <b>3330G&gt;A</b>     | M1110I                   | Pathogenic           | Exon 30 skipping, D1064Gfs*38                          | This work                             |

**Supplementary Table S2. Effects at the protein level of confirmed RNA splicing alterations.**

| Domain-Variant                | Structure      | Replica | WT                  |                              |                             | Mutant              |                          |                             | $\Delta\Delta G_{WT-MUT}$<br>(kcal/mol) |
|-------------------------------|----------------|---------|---------------------|------------------------------|-----------------------------|---------------------|--------------------------|-----------------------------|-----------------------------------------|
|                               |                |         | Unfolding time (ns) | Unfolded fraction (time, ns) | $\Delta G_{unf}$ (kcal/mol) | Unfolding time (ns) | Unfolded fraction (time) | $\Delta G_{unf}$ (kcal/mol) |                                         |
| C1-P187R                      | PDB id: 3cx2   | 1       | >1000               | $\chi < 0.01$<br>(1000)      | $> 3.92 \pm 0.33$           | >1000               | $\chi < 0.01$<br>(1000)  | $> 3.92 \pm 0.33$           | n.a.                                    |
|                               |                | 2       | >1000               |                              |                             | >1000               |                          |                             |                                         |
|                               |                | 3       | >1000               |                              |                             | >1000               |                          |                             |                                         |
| C3-V471E                      | PDB id: 2mq0   | 1       | >1000               | $\chi < 0.01$<br>(1000)      | $> 3.92 \pm 0.33$           | >1000               | $\chi = 0.33$<br>(1000)  | $2.74 \pm 0.38$             | $> 1.18 \pm 0.71$                       |
|                               |                | 2       | >1000               |                              |                             | 830                 |                          |                             |                                         |
|                               |                | 3       | >1000               |                              |                             | >1000               |                          |                             |                                         |
| C4-D610N                      | Homology model | 1       | >1000               | $\chi = 0.33$<br>(1000)      | $2.74 \pm 0.38$             | 520                 | $\chi > 0.99$<br>(520)   | $< 1.74 \pm 0.47$           | $> 1.00 \pm 0.85$                       |
|                               |                | 2       | >1000               |                              |                             | 430                 |                          |                             |                                         |
|                               |                | 3       | 750                 |                              |                             | 180                 |                          |                             |                                         |
| C5-P645L                      | PDB id: 1gxe   | 1       | 250                 | $\chi > 0.99$<br>(250)       | $< 1.51 \pm 0.50$           | 0                   | $\chi > 0.99$<br>(10)    | $< 0.47 \pm 0.60$           | $\sim 1.04 \pm 1.1$                     |
|                               |                | 2       | 50                  |                              |                             | 10                  |                          |                             |                                         |
|                               |                | 3       | 50                  |                              |                             | 0                   |                          |                             |                                         |
| C9-R1138H (His <sup>+</sup> ) | Homology model | 1       | >1000               | $\chi < 0.01$<br>(1000)      | $> 3.92 \pm 0.33$           | 320                 | $\chi > 0.99$<br>(860)   | $< 1.90 \pm 0.46$           | $> 2.02 \pm 0.79$                       |
|                               |                | 2       | >1000               |                              |                             | 320                 |                          |                             |                                         |
|                               |                | 3       | >1000               |                              |                             | 860                 |                          |                             |                                         |
| C9-R1138H (His <sup>0</sup> ) | Homology model | 1       | >1000               | $\chi < 0.01$<br>(1000)      | $> 3.92 \pm 0.33$           | >1000               | $\chi = 0.66$<br>(1000)  | $2.42 \pm 0.41$             | $> 1.5 \pm 0.74$                        |
|                               |                | 2       | >1000               |                              |                             | 630                 |                          |                             |                                         |
|                               |                | 3       | >1000               |                              |                             | 860                 |                          |                             |                                         |
| C10-G1206D                    | Homology model | 1       | >1000               | $\chi < 0.01$<br>(1000)      | $> 3.92 \pm 0.33$           | 400                 | $\chi > 0.99$<br>(400)   | $< 1.66 \pm 0.48$           | $> 2.26 \pm 0.81$                       |
|                               |                | 2       | >1000               |                              |                             | 10                  |                          |                             |                                         |
|                               |                | 3       | >1000               |                              |                             | 250                 |                          |                             |                                         |
| C10-T1237P                    | Homology model | 1       | >1000               | $\chi < 0.01$<br>(1000)      | $> 3.92 \pm 0.33$           | >1000               | $\chi = 0.33$<br>(1000)  | $2.74 \pm 0.38$             | $> 1.18 \pm 0.71$                       |
|                               |                | 2       | >1000               |                              |                             | >1000               |                          |                             |                                         |
|                               |                | 3       | >1000               |                              |                             | 620                 |                          |                             |                                         |
| C10-Y1251H                    | Homology model | 1       | >1000               | $\chi = 0.33$<br>(1000)      | $2.74 \pm 0.38$             | 100                 | $\chi = 0.66$<br>(1000)  | $2.42 \pm 0.41$             | $0.32 \pm 0.81$                         |
|                               |                | 2       | 570                 |                              |                             | 630                 |                          |                             |                                         |
|                               |                | 3       | >1000               |                              |                             | >1000               |                          |                             |                                         |
| C10-L1268P                    | Homology model | 1       | >1000               | $\chi = 0.33$<br>(1000)      | $2.74 \pm 0.38$             | 190                 | $\chi > 0.99$<br>(200)   | $< 1.44 \pm 0.50$           | $> 1.30 \pm 0.88$                       |
|                               |                | 2       | 540                 |                              |                             | 200                 |                          |                             |                                         |
|                               |                | 3       | >1000               |                              |                             | 30                  |                          |                             |                                         |

**Supplementary Table S3. Molecular dynamics simulations.** Three 1- $\mu$ s-long molecular dynamics (MD) simulations were run for each of the WT and mutant C1, C3, C4, C5, C9, and C10 domains indicated. The simulations were run at 410 K in protonation conditions corresponding to pH=7.0. For the C9-R1138H variant, the simulations were run considering protonated or neutral His1138 leading to similar results. To simulate the WT domains, we used high-resolution structures when available in the pdb (domains C1, C3, and C5), and resourced to homology models in the absence of high-resolution structural information. Mutations were introduced by replacing the WT residue side chain by that present in the variant, and selecting the conformer of lowest energy. Unfolding events were determined using clustering analyses (with a 0.3 nm RMSD cutoff) of two dimensional root-mean-square deviation matrices relating frames of a WT trajectory to frames of a mutant trajectory<sup>17</sup>. Predicted  $\Delta\Delta G$  induced by the mutations were estimated from the number of trajectories in which unfolding events are detected and their unfolding times, according to published formalisms<sup>18</sup>. Positive  $\Delta\Delta G$  values are indicative of mutant-induced domain destabilization at 298 K.

## Supplementary References

- 1 Greenfield, N. J. Using circular dichroism collected as a function of temperature to determine the thermodynamics of protein unfolding and binding interactions. *Nat Protoc* **1**, 2527-2535 (2006). <https://www.ncbi.nlm.nih.gov/pubmed/17406506>.
- 2 Pricolo, M. R., Herrero-Galán, E., Mazzaccara, C., Losi, M. A., Alegre-Cebollada, J. & Frisso, G. Protein Thermodynamic Destabilization in the Assessment of Pathogenicity of a Variant of Uncertain Significance in Cardiac Myosin Binding Protein C. *Journal of Cardiovascular Translational Research* (2020). <https://doi.org/10.1007/s12265-020-09959-6>.
- 3 Yang, L., Falkesgaard, M., Thulstrup, P., Walmod, P., Lo Leggio, L. & Rasmussen, K. Expression, refolding and spectroscopic characterization of fibronectin type III (FnIII)-homology domains derived from human fibronectin leucine rich transmembrane protein (FLRT)-1, -2, and -3. *PeerJ* **5**, e3550 (2017).
- 4 Černý, J., Biedermannová, L., Mikulecký, P., Zahradník, J., Charnavets, T., Šebo, P. & Schneider, B. Redesigning protein cavities as a strategy for increasing affinity in protein-protein interaction: interferon- $\gamma$  receptor 1 as a model. *Biomed Res Int* **2015**, 716945-716945 (2015). <https://pubmed.ncbi.nlm.nih.gov/26060819>.
- 5 Ito, K., Patel, P. N., Gorham, J. M., McDonough, B., DePalma, S. R., Adler, E. E., . . . Seidman, J. G. Identification of pathogenic gene mutations in LMNA and MYBPC3 that alter RNA splicing. *Proceedings of the National Academy of Sciences of the United States of America* **114**, 7689-7694 (2017). <http://www.ncbi.nlm.nih.gov/pubmed/28679633>.
- 6 Guerois, R., Nielsen, J. E. & Serrano, L. Predicting changes in the stability of proteins and protein complexes: a study of more than 1000 mutations. *Journal of molecular biology* **320**, 369-387 (2002). <http://www.ncbi.nlm.nih.gov/pubmed/12079393>.
- 7 Lin, J., Zheng, D.-D., Tao, Q., Yang, J.-H., Jiang, W.-P., Yang, X.-J., . . . Li, X. Two novel mutations of the MYBPC3 gene identified in Chinese families with hypertrophic cardiomyopathy. *Canadian Journal of Cardiology* **26**, 518-522 (2010). <http://www.sciencedirect.com/science/article/pii/S0828282X10704645>.
- 8 Singer, E. S., Ingles, J., Semsarian, C. & Bagnall, R. D. Key Value of RNA Analysis of MYBPC3 Splice-Site Variants in Hypertrophic Cardiomyopathy. *Circ Genom Precis Med* **12**, e002368 (2019). <https://www.ncbi.nlm.nih.gov/pubmed/30645170>.
- 9 Helms, A. S., Davis, F. M., Coleman, D., Bartolone, S. N., Glazier, A. A., Pagani, F., . . . Day, S. M. Sarcomere mutation-specific expression patterns in human hypertrophic cardiomyopathy. *Circulation. Cardiovascular genetics* **7**, 434-443 (2014). <http://www.ncbi.nlm.nih.gov/pubmed/25031304>.
- 10 Andersen, P. S., Havndrup, O., Bundgaard, H., Larsen, L. A., Vuust, J., Pedersen, A. K., . . . Christiansen, M. Genetic and phenotypic characterization of mutations in myosin-binding protein C (MYBPC3) in 81 families with familial hypertrophic cardiomyopathy: total or partial haploinsufficiency. *Eur J Hum Genet* **12**, 673-677 (2004). <https://www.ncbi.nlm.nih.gov/pubmed/15114369>.
- 11 Carrier, L., Bonne, G., Barend, E., Yu, B., Richard, P., Niel, F., . . . Schwartz, K. Organization and sequence of human cardiac myosin binding protein C gene (MYBPC3) and identification of mutations predicted to produce truncated proteins in familial hypertrophic cardiomyopathy. *Circ Res* **80**, 427-434 (1997). <http://www.ncbi.nlm.nih.gov/pubmed/9048664>.
- 12 Crehalet, H., Millat, G., Albuissou, J., Bonnet, V., Rouvet, I., Rousson, R. & Bozon, D. Combined use of in silico and in vitro splicing assays for interpretation of genomic variants of unknown significance in cardiomyopathies and channelopathies. *2012* **2** (2012). <https://www.pagepressjournals.org/index.php/cardiogen/article/view/423>.
- 13 Jääskeläinen, P., Kuusisto, J., Miettinen, R., Kärkkäinen, P., Kärkkäinen, S., Heikkinen, S., . . . Laakso, M. Mutations in the cardiac myosin-binding protein C gene are the predominant cause of familial hypertrophic cardiomyopathy in eastern Finland. *Journal of Molecular Medicine* **80**, 412-422 (2002). <https://doi.org/10.1007/s00109-002-0323-9>.
- 14 Marston, S., Copeland, O., Gehmlich, K., Schlossarek, S. & Carrier, L. How do MYBPC3 mutations cause hypertrophic cardiomyopathy? *Journal of muscle research and cell motility* **33**, 75-80 (2012). <http://www.ncbi.nlm.nih.gov/pubmed/22057632>.

- 15 Bonne, G., Carrier, L., Bercovici, J., Cruaud, C., Richard, P., Hainque, B., . . . Schwartz, K. Cardiac myosin binding protein-C gene splice acceptor site mutation is associated with familial hypertrophic cardiomyopathy. *Nature genetics* **11**, 438-440 (1995). <<http://www.ncbi.nlm.nih.gov/pubmed/7493026>>.
- 16 Watkins, H., Conner, D., Thierfelder, L., Jarcho, J. A., MacRae, C., McKenna, W. J., . . . Seidman, C. E. Mutations in the cardiac myosin binding protein-C gene on chromosome 11 cause familial hypertrophic cardiomyopathy. *Nature genetics* **11**, 434-437 (1995). <<https://doi.org/10.1038/ng1295-434>>.
- 17 Zhang, M., Zheng, J., Nussinov, R. & Ma, B. Oncogenic Mutations Differentially Affect Bax Monomer, Dimer, and Oligomeric Pore Formation in the Membrane. *Scientific Reports* **6**, 33340 (2016). <<https://doi.org/10.1038/srep33340>>.
- 18 Galano-Frutos, J. J., García-Cebollada, H. & Sancho, J. Molecular dynamics simulations for genetic interpretation in protein coding regions: where we are, where to go and when. *Briefings in Bioinformatics* (2019). <<https://doi.org/10.1093/bib/bbz146>>.
